# Supplementary material for: Ambulation Mode Classification of Individuals with Transfemoral Amputation through A-Mode Sonomyography and Convolutional Neural Networks
Source: MDPI journal article supplement (doi:10.3390/s22239350), 2022-12-01
Supplement: s1 [file s1]

Supplementary Material

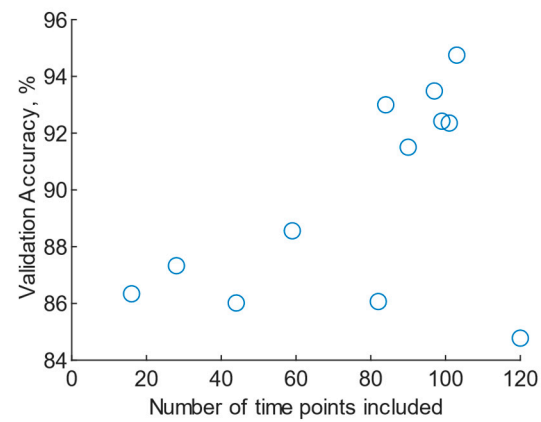

**Figure S1:** Classification accuracy versus temporal sequence length.

**Table S1:** Ambulation Mode Classification Strategies for Knee-Ankle Prostheses, based on tables provided in [18]. An extensive amount of work has been down on ambulation classification strategies for knee-ankle prostheses. Much of the work has focused on the integration of electromyography and mechanical sensors. A few of the studies have examined the relative contributions of each of these sensor types, and suggest that EMG may be an especially beneficial addition to mechanical sensors during swing phase. The limitations of the previous work include the limited number of activities: sitting and standing are often not considered, despite being important activities of daily living. Another limitation is that only 12 of the 33 studies shown included 5 or more transfemoral amputee subjects. Given the changes in musculature that accompany amputation, results obtained through EMG sensing in healthy subjects may not generalize to amputee subjects.

| Article                    | Groups (N) <sup>i</sup> | Locomotion Activities <sup>ii</sup> | Sensors <sup>iii</sup>           | Axes × Sensors                            | Offline/ Online | Recognition/ Prediction | Features <sup>iv</sup>                 | Algorithm <sup>v</sup> | Accuracy |
|----------------------------|-------------------------|-------------------------------------|----------------------------------|-------------------------------------------|-----------------|-------------------------|----------------------------------------|------------------------|----------|
| Du et al. 2012 [36]        | TF (9)                  | LW, SA, SD, RA, RD                  | EMG<br>Load cell                 | 1 × 9<br>6 × 1                            | Off             | P                       | MAV, SSC, WL, ZC<br>Mean, Max, Min     | LDA                    | 98       |
| Du et al. 2013 [38]        | TF (4)                  | LW, SA, SD, RA, RD                  | EMG<br>Load cell                 | 1 × 7<br>6 × 1                            | Off             | P                       | MAV, SSC, WL, ZC<br>Mean, Max, Min     | EBA                    | 92.5     |
| Godiyal et al. 2018 [24]   | TF (2)/<br>Healthy (8)  | LW, SA, SD, RA, RD                  | FMG<br>Pressure                  | 1 × 8<br>3 × 1                            | Off             | R                       | Mean, Max, Min, SD, RMS, WL, SSC, MAD  | LDA                    | 96.1     |
| Hernandez et al. 2012 [35] | TF (1)                  | LW, SA, SD, RA, RD, ST, SIT         | Load cell<br>EMG                 | 6 × 1<br>1 × 7                            | Off             | R                       | MAV, SSC, WL, ZC<br>Mean, Max, Min     | SVM                    | NP       |
| Hernandez et al. 2013 [39] | Healthy (1)             | LW, SA, ST                          | Load cell<br>EMG                 | 6 × 1<br>1 × 7                            | Off and On      | P                       | MAV, SSC, WL, ZC<br>Mean, Max, Min     | SVM                    | 99.9     |
| Huang et al. 2009 [32]     | TF (2)/<br>Healthy (8)  | LW, SA, SD, OBS, Turns, ST          | EMG<br>Pressure                  | 1 × 11<br>2 × 1                           | Off             | R                       | MAV, SSC, WL, ZC                       | LDA                    | 95.5     |
| Huang et al. 2010 [33]     | TF (1)/<br>Healthy (5)  | LW, SA, SD, OBS                     | EMG<br>Pressure                  | 1 × 11<br>NP                              | Off             | P                       | MAV, SSC, WL, ZC                       | LDA                    | NR       |
| Huang et al. 2011 [29]     | TF (5)                  | LW, SA, SD, RA, RD, OBS             | EMG<br>Load cell<br>Pressure     | 1 × 11<br>6 × 1<br>NP                     | Off             | P                       | MAV, SSC, WL, ZC<br>Mean, Max, Min     | SVM                    | 100      |
| Liu et al. 2016 [19]       | TF (1)/<br>Healthy (6)  | LW, SA, SD, RA, RD                  | EMG<br>Load cell<br>IMU<br>Laser | 1 × 8<br>6 × 1<br>6(A, G, α) × 1<br>1 × 1 | Off and On      | P                       | MAV, SSC, WL, ZC<br>Mean, Max, Min, SD | LDA                    | ~98      |
|                            |                         |                                     | EMG                              | 1 × 7                                     |                 | P                       | MAV, SSC, WL, ZC                       | EBA/LIFT               | 94.3     |

|                                 |                        |                           |                                                                           |                                                                                                               |               |         |                                                          |     |      |
|---------------------------------|------------------------|---------------------------|---------------------------------------------------------------------------|---------------------------------------------------------------------------------------------------------------|---------------|---------|----------------------------------------------------------|-----|------|
| Liu et al.<br>2017 [44]         | TF (2)/<br>Healthy (2) | LW, SA, SD,<br>RA, RD     | Load cell                                                                 | $6 \times 1$                                                                                                  | Off and<br>On |         | Mean, Max, Min, SD                                       |     |      |
| Liu et al.<br>2017 [8]          | TF (2)/<br>Healthy (3) | LW, SA, SD,<br>RA, RD     | IMU<br>Pressure                                                           | $4(A, G) \times 1$<br>$2 \times 2$                                                                            | Off           | R       | ICC                                                      | HMM | 95.8 |
| Rabe et al.<br>2021 [28]        | Healthy<br>(10)        | LW, SA, SD,<br>RA, RD     | EMG<br>B-mode US                                                          | $1 \times 8$<br>$128 \times 1$                                                                                | Off           | R       | MAV, SSC, ZC, WL,<br>AR<br>Mean<br>Intensity             | LDA | 99.8 |
| Simon et al.<br>2017 [9]        | TF (6)                 | LW, SA, SD,<br>RA, RD, ST | Joint Angle<br>Joint Velocity<br>Motor Current<br>IMU<br>Load cell        | $1 \times 2$<br>$1 \times 2$<br>$1 \times 2$<br>$6(A, G, \alpha) \times 1$<br>$6 \times 1$                    | Off           | P       | WT                                                       | DBN | 99.6 |
| Spanias et<br>al. 2014 [41]     | TF (4)                 | LW, SA, SD,<br>RA, RD     | Joint Angle<br>Joint Velocity<br>Motor Current<br>IMU<br>Load cell<br>EMG | $1 \times 2$<br>$1 \times 2$<br>$1 \times 2$<br>$6(A, G, \alpha) \times 1$<br>$1 \times 1$<br>$1 \times 9$    | Off           | P and R | MAV, SSC, WL, ZC,<br>AR<br>Mean, Max, Min, SD,<br>IV, FV | LDA | ~ 96 |
| Spanias et<br>al. 2015 [31]     | TF (6)                 | LW, SA, SD,<br>RA, RD     | Joint Angle<br>Joint Velocity<br>Motor Current<br>IMU<br>Load cell<br>EMG | $1 \times 2$<br>$1 \times 2$<br>$1 \times 2$<br>$8(3A, 3G, 2\alpha) \times 1$<br>$6 \times 1$<br>$1 \times 4$ | Off           | P       | MAV, SSC, WL, ZC,<br>AR<br>Mean, Max, Min, SD,<br>IV, FV | DBN | ~ 99 |
| Spanias et<br>al. 2016a<br>[42] | TF (8)                 | LW, SA, SD,<br>RA, RD     | Joint Angle<br>Joint Velocity<br>Motor Current<br>IMU<br>Load cell<br>EMG | $1 \times 2$<br>$1 \times 2$<br>$1 \times 2$<br>$6(A, G, \alpha) \times 1$<br>$1 \times 1$<br>$1 \times 9$    | Off           | P       | MAV, SSC, WL, ZC,<br>AR<br>Mean, Max, Min, SD            | DBN | NR   |

|                            |                      |                        |                |                                |            |         |                            |     |        |
|----------------------------|----------------------|------------------------|----------------|--------------------------------|------------|---------|----------------------------|-----|--------|
| Spanias et al. 2016b [13]  | Healthy (2)          | LW, SA, SD, RA, RD, ST | Joint Angle    | $1 \times 2$                   | Off and On | P and R | Mean, Max, Min, SD, IV, FV | DBN | 96.7   |
|                            |                      |                        | Joint Velocity | $1 \times 2$                   |            |         |                            |     |        |
|                            |                      |                        | Motor Current  | $1 \times 2$                   |            |         |                            |     |        |
|                            |                      |                        | IMU            | $10(3A, 3G, 4\alpha) \times 1$ |            |         |                            |     |        |
|                            |                      |                        | Load cell      | $6 \times 1$                   |            |         |                            |     |        |
| Spanias et al. 2017 [14]   | TF (3)               | LW, SA, SD, RA, RD, ST | Joint Angle    | $1 \times 2$                   | Off and On | P and R | Mean, Max, Min, SD, IV, FV | DBN | 98.8   |
|                            |                      |                        | Joint Velocity | $1 \times 2$                   |            |         |                            |     |        |
|                            |                      |                        | Motor Current  | $1 \times 2$                   |            |         |                            |     |        |
|                            |                      |                        | IMU            | $10(3A, 3G, 4\alpha) \times 1$ |            |         |                            |     |        |
|                            |                      |                        | Load cell      | $6 \times 1$                   |            |         |                            |     |        |
| Spanias et al. 2018 [43]   | TF (8)               | LW, SA, SD, RA, RD, ST | Joint Angle    | $1 \times 2$                   | Off and On | P and R | MAV, SSC, WL, ZC, AR       | DBN | 95.97  |
|                            |                      |                        | Joint Velocity | $1 \times 2$                   |            |         |                            |     |        |
|                            |                      |                        | Motor Current  | $1 \times 2$                   |            |         |                            |     |        |
|                            |                      |                        | IMU            | $10(3A, 3G, 4\alpha) \times 1$ |            |         | Mean, Max, Min, SD, IV, FV |     |        |
|                            |                      |                        | Load cell      | $6 \times 1$                   |            |         |                            |     |        |
|                            |                      |                        | EMG            | $1 \times 8$                   |            |         |                            |     |        |
| Stolyarov et al. 2018 [10] | TF (6)               | LW, SA, SD, RA, RD     | IMU            | $6(A, G) \times 1$             | Off        | P       | Mean, Max, Min, SD         | LDA | 94.1   |
| Su et al. 2019 [11]        | TF (1)/ Healthy (10) | LW, SA, SD, RA, RD     | IMU            | $6(A, G) \times 3$             | Off        | R       | Raw Data                   | CNN | 89.2   |
| Woodward et al. 2016 [6]   | TF (6)               | LW, SA, SD, RA, RD     | IMU            | $7(3A, 3G, 1\alpha) \times 1$  | Off        | P       | Mean, Max, Min, SD, IV, FV | ANN | 98.9   |
|                            |                      |                        | Joint Angle    | $1 \times 2$                   |            |         |                            |     |        |
|                            |                      |                        | Joint Velocity | $1 \times 2$                   |            |         |                            |     |        |
|                            |                      |                        | Joint Current  | $1 \times 2$                   |            |         |                            |     |        |
|                            |                      |                        | Load cell      | $6 \times 1$                   |            |         |                            |     |        |
| Young et al. 2013a [7]     | TF (4)               | LW, SA, SD, RA, RD     | IMU            | $6(A, G) \times 1$             | Off        | P       | MAV, SSC, WL, ZC, AR       | DBN | ~ 98.2 |
| Joint Angle                | $1 \times 2$         |                        |                |                                |            |         |                            |     |        |

|                         |                     |                    |                |             |            |   |                            |     |      |
|-------------------------|---------------------|--------------------|----------------|-------------|------------|---|----------------------------|-----|------|
|                         |                     |                    | Joint Velocity | 1 × 2       |            |   |                            |     |      |
|                         |                     |                    | Joint Current  | 1 × 2       |            |   | Mean, Max, Min, SD         |     |      |
|                         |                     |                    | Load cell      | 1 × 1       |            |   |                            |     |      |
|                         |                     |                    | EMG            | 1 × 9       |            |   |                            |     |      |
| Young et al. 2013b [15] | TF (6)              | LW, SA, SD, RA, RD | IMU            | 6(A, G) × 1 | Off        | P | Mean, Max, Min, SD         | DBN | ~ 98 |
|                         |                     |                    | Joint Angle    | 1 × 2       |            |   |                            |     |      |
|                         |                     |                    | Joint Velocity | 1 × 2       |            |   |                            |     |      |
|                         |                     |                    | Joint Current  | 1 × 2       |            |   |                            |     |      |
|                         |                     |                    | Load cell      | 1 × 1       |            |   |                            |     |      |
| Young et al. 2013c [40] | TF (4)              | LW, SA, SD, RA, RD | IMU            | 6(A, G) × 1 | Off        | P | MAV, SSC, WL, ZC, AR       | LDA | 86.4 |
|                         |                     |                    | Joint Angle    | 1 × 2       |            |   |                            |     |      |
|                         |                     |                    | Joint Velocity | 1 × 2       |            |   |                            |     |      |
|                         |                     |                    | Joint Current  | 1 × 2       |            |   |                            |     |      |
|                         |                     |                    | Load cell      | 1 × 1       |            |   |                            |     |      |
| EMG                     | 1 × 7               | Mean, Max, Min, SD |                |             |            |   |                            |     |      |
| Young et al. 2014a [12] | TF (6)              | LW, SA, SD, RA, RD | IMU            | 6(A, G) × 1 | Off        | P | Mean, Max, Min, SD         | LDA | ~ 99 |
|                         |                     |                    | Joint Angle    | 1 × 2       |            |   |                            |     |      |
|                         |                     |                    | Joint Velocity | 1 × 2       |            |   |                            |     |      |
|                         |                     |                    | Joint Current  | 1 × 2       |            |   |                            |     |      |
|                         |                     |                    | Load cell      | 1 × 1       |            |   |                            |     |      |
| Young et al. 2014b [30] | TF (8)              | LW, SA, SD, RA, RD | IMU            | 6(A, G) × 1 | Off        | P | MAV, SSC, WL, ZC, AR       | DBN | ~ 99 |
|                         |                     |                    | Joint Angle    | 1 × 2       |            |   |                            |     |      |
|                         |                     |                    | Joint Velocity | 1 × 2       |            |   |                            |     |      |
|                         |                     |                    | Joint Current  | 1 × 2       |            |   |                            |     |      |
|                         |                     |                    | Load cell      | 1 × 1       |            |   |                            |     |      |
| EMG                     | 1 × 9               | Mean, Max, Min, SD |                |             |            |   |                            |     |      |
| Young et al. 2016 [16]  | TF (8)              | LW, SA, SD, RA, RD | IMU            | 6(A, G) × 1 | Off        | P | Mean, Max, Min, SD, IV, FV | DBN | ~ 99 |
|                         |                     |                    | Joint Angle    | 1 × 2       |            |   |                            |     |      |
|                         |                     |                    | Joint Velocity | 1 × 2       |            |   |                            |     |      |
|                         |                     |                    | Joint Current  | 1 × 2       |            |   |                            |     |      |
|                         |                     |                    | Load cell      | 1 × 1       |            |   |                            |     |      |
| Zhang et al. 2011 [34]  | TF (1)/ Healthy (1) | LW, SA, SD, RA, RD | Load cell      | 6 × 1       | Off and On | P | MAV, SSC, WL, ZC           | LDA | > 97 |
|                         |                     |                    | EMG            | 1 × 11      |            |   | Mean, Max, Min             |     |      |

|                         |                        |                             |                                  |                                                                    |            |   |                                    |           |      |
|-------------------------|------------------------|-----------------------------|----------------------------------|--------------------------------------------------------------------|------------|---|------------------------------------|-----------|------|
| Zhang et al. 2013 [37]  | TF (4)                 | LW, SA, SD, RA, RD, ST, SIT | IMU<br>Load cell<br>EMG          | $6(A, G) \times 2$<br>$6 \times 1$<br>$1 \times 8$                 | Off and On | P | MAV, SSC, WL, ZC<br>Mean, Max, Min | SVM       | 95   |
| Zhang et al. 2019a [22] | TF (3)/<br>Healthy (6) | LW, SA, SD, RA, RD          | Depth Camera<br>IMU              | $224 \times 171$<br>$3(\alpha) \times 1$                           | Off        | P | Raw data                           | CNN + HMM | 96.4 |
| Zhang et al. 2019b [23] | TF (3)/<br>Healthy (6) | LW, SA, SD, RA, RD          | Depth Camera<br>IMU              | $224 \times 171$<br>$3(\alpha) \times 1$                           | Off        | P | Raw data                           | CNN       | 94.9 |
| Zhang et al. 2012 [18]  | Healthy (1)            | LW, SA, SD, ST              | IMU<br>Laser<br>Load cell<br>EMG | $6(A, G) \times 1$<br>$1 \times 1$<br>$6 \times 1$<br>$1 \times 7$ | Off and On | P | MAV, SSC, WL, ZC<br>Mean, Max, Min | LDA       | 97.6 |

<sup>i</sup> Groups consisted of healthy or transfemoral amputee (TF) subjects.

<sup>ii</sup> Locomotion activities consisted of level walking (LW), stair ascent (SA), stair descent (SD), ramp ascent (RA), ramp descent (RD), standing (ST), sitting (SIT), stepping over an obstacle (OBS), and turning.

<sup>iii</sup> Specific sensors included electromyography (EMG), force myography (FMG), inertial measurement units (IMU), pressure sensors, motor current, joint current, joint angles, joint velocities, laser range finders (Laser), load cells, and depth cameras.

<sup>iv</sup> Features included raw data, mean, maximum (Max), minimum (Min), mean absolute value (MAV), root mean square error (RMS), slope sign changes (SSC), waveform length (WL), zero crossings (ZC), standard deviation (SD), initial value (IV), final value (FV), autocorrelation coefficients of an autoregressive model (AR), and wavelet transform (WT).

<sup>v</sup> Algorithms included linear discriminant analysis (LDA), entropy based algorithm (EBA), support vector machine (SVM), dynamic Bayesian network (DBN), learning from testing data (LIFT), artificial neural network (ANN), convolutional neural network (CNN), and hidden Markov model (HMM).
